# Supplementary material for: Reducing the Kidney Uptake of High Contrast CXCR4 PET Imaging Agents via Linker Modifications
Source: MDPI journal article supplement (doi:10.3390/pharmaceutics14071502), 2022-07-20
Supplement: s1 [file s1]

## **Methods**

### **Chemical Synthesis**

Unless otherwise noted, amino acid couplings were performed using 4/8/4 equivalents of the Fmoc-Amino Acid/DIC/Oxyma for 6 mins at 90°C using the CEM Liberty Blue Microwave Peptide Synthesizer. Fmoc groups were removed after amino acid couplings were completed using a 20% piperidine solution in DMF for 1 min at 90°C unless otherwise noted. The resin was washed three times with 3 mL DMF after each deprotection. Peptides were deprotected and simultaneously cleaved from the resin using a 92.5/5/2.5 TFA/TIS/H<sub>2</sub>O cocktail unless otherwise stated.

#### *Synthesis of BL06*

Fmoc-Rink Amide ProTide resin (CEM, 0.25 mmol, 0.58 mmol/g) was deprotected with 20% v/v piperidine in DMF for 1 min at 90°C twice. Fmoc-Lys(ivDde)-OH was then coupled to the resin. The resin was then capped using 1-acetylimidazole in DMF (0.1 w/v) at room temperature for 30 minutes. Fmoc-Lys(iPr,Boc)-OH, Fmoc-D-Glu(OAll)-OH, Fmoc-Gly-OH (two coupling cycles), Fmoc-2Nal-OH (two coupling cycles), Fmoc-D-Arg-OH (two coupling cycles for 4 mins each), Fmoc-Lys(iPr,Boc)-OH, Fmoc-Tyr(tBu)-OH, and Fmoc-Phe-OH (two coupling cycles) were sequentially coupled to the peptidyl resin. At a 0.1 mmol scale, the -OAll protecting group on D-Glu was removed using Pd(PPh<sub>3</sub>)<sub>4</sub> (25 mg)/Phenylsilane (700 µL) in DCM (5 mL) (2 × 6 min at 35°C), with 3 washes of 3 mL of DCM in between deprotections. The N<sup>α</sup>-Fmoc on Phe was then removed, and cyclization was performed using DIC/HOBt in DMF (3 × 10 min at 90°C). Following cyclization, the ivDde protecting group was removed by 2% v/v hydrazine in DMF (5 × 5 min at RT). The resin (0.025 mmol) containing the macrocyclic peptide was

coupled with Fmoc-Pip-OH/HATU/DIEA in DMF for 10 min at 50°C for two cycles. The chelator DOTA tri-*t*-butyl ester (4 equiv.) in DMF was coupled to the terminal amine with HATU/DIEA (4/8 equiv.) for 10 minutes at 50°C, with two coupling cycles. The peptide was deprotected and cleaved for 4 h at 35 °C and the crude peptide mixture was worked up as previously described. The reaction mixture was purified by HPLC using the preparative column eluted with 10-25% acetonitrile in water with 0.1% TFA for 0-15 mins at a flow rate of 30 mL/min. The retention time was 14.0 min. ESI-MS: calculated  $[M+2H]^{2+}$  for BL06  $C_{91}H_{140}N_{22}O_{19}$  922.53; found  $[M+2H]^{2+}$  922.89.

#### *Synthesis of Ga-BL06*

For Ga-BL06, a solution of BL06 (1.54 mg, 0.84  $\mu$ mol) and  $GaCl_3$  (29.3  $\mu$ L, 0.2 M, 5.85  $\mu$ mol) in 500  $\mu$ L sodium acetate buffer (0.1 M, pH 4.2) was incubated at 80°C for 15 min. The reaction mixture was purified by HPLC using the preparative column eluted with 10-25% acetonitrile in water with 0.1% TFA for 0-15 min at a flow rate of 30 mL/min. The retention time of Ga-BL06 was 13.6 min, and the yield of the peptide was 87%. ESI-MS: calculated  $[M+2H]^{2+}$  for Ga-BL06  $C_{91}H_{138}GaN_{22}O_{19}$  955.99; found  $[M+2H]^{2+}$  956.86.

#### *Synthesis of BL20*

From the synthesis of BL06, following the removal of the ivDde group, the resin (0.025 mmol) was coupled with three Fmoc-D-Glu(OtBu)-OH sequentially. Afterwards, the chelator DOTA tri-*t*-butyl ester (4 equiv.) in DMF was coupled to the terminal amine with HATU/DIEA (4/8 equiv.) for 18 hours at room temperature. The peptide was deprotected and cleaved for 3.5 h at 35 °C and the crude peptide mixture was worked up

as previously described. The reaction mixture was purified by HPLC using the preparative column eluted with 11-31% acetonitrile in water with 0.1% TFA over 20 mins at a flow rate of 30 mL/min. The retention time was 13.3 min. ESI-MS: calculated  $[M+2H]^{2+}$  for BL20  $C_{99}H_{147}N_{23}O_{27}$  1046.55; found  $[M+2H]^{2+}$  1045.91.

### *Synthesis of Ga-BL20*

For Ga-BL20, a solution of BL20 (0.94 mg, 0.45  $\mu$ mol) and  $GaCl_3$  (13  $\mu$ L, 0.2 M, 2.6  $\mu$ mol) in 500  $\mu$ L sodium acetate buffer (0.1 M, pH 4.2) was incubated at 80°C for 15 min. The reaction mixture was purified by HPLC using the preparative column eluted with 11-31% acetonitrile in water with 0.1% TFA for 30 min at a flow rate of 30 mL/min. The retention time of Ga-BL20 was 13.4 min. ESI-MS: calculated  $[M+2H]^{2+}$  for Ga-BL20  $C_{99}H_{147}GaN_{23}O_{27}$  1080.01; found  $[M+2H]^{2+}$  1079.34.

### *Synthesis of BL17*

From the synthesis of BL06, following the removal of the ivDde group, the resin (0.025 mmol) was coupled with three Fmoc-Aad(OtBu)-OH sequentially. Afterwards, the chelator DOTA tri-*t*-butyl ester (4 equiv.) in DMF was coupled to the terminal amine with HATU/DIEA (4/8 equiv.) for 18 hours at room temperature. The peptide was deprotected and cleaved for 3.5 h at 35 °C and the crude peptide mixture was worked up as previously described. The reaction mixture was purified by HPLC using the preparative column eluted with 10-30% acetonitrile in water with 0.1% TFA over 20 mins at a flow rate of 30

mL/min. The retention time was 14.3 min. ESI-MS: calculated  $[M+2H]^{2+}$  for BL17  $C_{102}H_{155}N_{23}O_{27}$  1067.57; found  $[M+2H]^{2+}$  1067.41.

#### *Synthesis of Ga-BL17*

For Ga-BL17, a solution of BL17 (2.3 mg, 1.1  $\mu$ mol) and  $GaCl_3$  (27  $\mu$ L, 0.2 M, 5.4  $\mu$ mol) in 500  $\mu$ L sodium acetate buffer (0.1 M, pH 4.2) was incubated at 90°C for 20 min. The reaction mixture was purified by HPLC using the preparative column eluted with 10-30% acetonitrile in water with 0.1% TFA over 20 mins at a flow rate of 30 mL/min. The retention time of Ga-BL17 was 14.6 min, and the yield of the peptide was 86%. ESI-MS: calculated  $[M+2H]^{2+}$  for Ga-BL17  $C_{102}H_{153}GaN_{23}O_{27}$  1101.03; found  $[M+2H]^{2+}$  1100.98.

#### *Synthesis of BL25*

From the synthesis of BL06, following the removal of the ivDde group, the resin (0.025 mmol) was coupled with three Fmoc-D-Asp(OBno)-OH sequentially using a 2/4/2 equiv. of amino acid/DIC/Oxyma. The Fmoc was deprotected at room temperature for 5 minutes between couplings. Afterwards, the chelator DOTA tri-*t*-butyl ester (4 equiv.) in DMF was coupled to the terminal amine with HATU/DIEA (4/8 equiv.) for 18 hours at room temperature. The peptide was deprotected and cleaved for 3.5 h at 35 °C and the crude peptide mixture was worked up as previously described. The reaction mixture was purified by HPLC using the preparative column eluted with 12-32% acetonitrile in water with 0.1% TFA for 0-20 min at a flow rate of 30 mL/min. The retention time was 12.0 min. ESI-MS: calculated  $[M+2H]^{2+}$  for BL25  $C_{96}H_{143}N_{23}O_{27}$  1025.53; found  $[M+2H]^{2+}$  1024.95.

### *Synthesis of Ga-BL25*

For Ga-BL25, a solution of BL25 (2.06 mg, 1.0  $\mu\text{mol}$ ) and  $\text{GaCl}_3$  (27.8  $\mu\text{L}$ , 0.2 M, 5.55  $\mu\text{mol}$ ) in 500  $\mu\text{L}$  sodium acetate buffer (0.1 M, pH 4.2) was incubated at 80°C for 15 min. The reaction mixture was purified by HPLC using the preparative column eluted with 12-32% acetonitrile in water with 0.1% TFA for 0-20 min at a flow rate of 30 mL/min. The retention time was 12.3 min, and the yield of the peptide was 76%. ESI-MS: calculated  $[\text{M}+3\text{H}]^{3+}$  for Ga-BL25  $\text{C}_{96}\text{H}_{143}\text{GaN}_{23}\text{O}_{27}$  706.66; found  $[\text{M}+3\text{H}]^{3+}$  706.20.

### *Synthesis of BL31*

From the synthesis of BL06, following the removal of the ivDde group, the resin (0.025 mmol) was coupled with three Fmoc-CysAcid-OH sequentially. Afterwards, the chelator DOTA tri-t-butyl ester (4 equiv.) in DMF was coupled to the terminal amine with HATU/DIEA (4/8 equiv.) for 18 hours at room temperature. The peptide was deprotected and cleaved for 3.5 h at 35 °C and the crude peptide mixture was worked up as previously described. The reaction mixture was purified by HPLC using the preparative column eluted with 11-31% acetonitrile in water with 0.1% TFA over 20 mins at a flow rate of 30 mL/min. The retention time was 13.0 min. ESI-MS: calculated  $[\text{M}+2\text{H}]^{2+}$  for BL31  $\text{C}_{93}\text{H}_{143}\text{N}_{23}\text{O}_{30}\text{S}_3$  1079.48; found  $[\text{M}+2\text{H}]^{2+}$  1079.56.

### *Synthesis of Ga-BL31*

For Ga-BL31, a solution of BL31 (1.34 mg, 0.62  $\mu\text{mol}$ ) and  $\text{GaCl}_3$  (15.5  $\mu\text{L}$ , 0.2 M, 3.1  $\mu\text{mol}$ ) in 500  $\mu\text{L}$  sodium acetate buffer (0.1 M, pH 4.2) was incubated at 80°C for 15 min. The reaction mixture was purified by HPLC using the preparative column eluted with

11-31% acetonitrile in water with 0.1% TFA for 30 min at a flow rate of 30 mL/min. The retention time of Ga-BL31 was 11.7 min. ESI-MS: calculated  $[M+2H]^{2+}$  for Ga-BL31  $C_{93}H_{141}GaN_{23}O_{30}S_3$  1112.93; found  $[M+2H]^{2+}$  1112.21.

### *Synthesis of BL30*

From the synthesis of BL06, following the removal of the ivDde group, the resin (0.025 mmol) was coupled with three Fmoc-Glu(OtBu)-OH sequentially. Afterwards, the chelator DOTAGA tetra-t-butyl ester (4 equiv.) in DMF was coupled to the terminal amine with HATU/DIEA (4/8 equiv.) for 18 hours at room temperature. The peptide was deprotected and cleaved for 3.5 h at 35°C and the crude peptide mixture was worked up as previously described. The reaction mixture was purified by HPLC using the preparative column eluted with 11-31% acetonitrile in water with 0.1% TFA over 20 mins at a flow rate of 30 mL/min. The retention time was 12.98 min. ESI-MS: calculated  $[M+2H]^{2+}$  for BL30  $C_{102}H_{153}N_{23}O_{29}$  1082.56; found  $[M+2H]^{2+}$  1082.89.

### *Synthesis of Ga-BL30*

For Ga-BL30, a solution of BL30 (1.88 mg, 0.87  $\mu$ mol) and GaCl<sub>3</sub> (21.7  $\mu$ L, 0.2 M, 4.34  $\mu$ mol) in 500  $\mu$ L sodium acetate buffer (0.1 M, pH 4.2) was incubated at 80°C for 15 min. The reaction mixture was purified by HPLC using the preparative column eluted with 11-31% acetonitrile in water with 0.1% TFA for 30 min at a flow rate of 30 mL/min. The retention time of Ga-BL30 was 11.70 min. ESI-MS: calculated  $[M+2H]^{2+}$  for Ga-BL30  $C_{102}H_{150}GaN_{23}O_{29}$  1115.51; found  $[M+2H]^{2+}$  1115.23.

## **Radiochemical Data**

Method A: 4.5 mL/min, 23% ACN (0.1% TFA)

Method B: 2 mL/min, 23% ACN (0.1% TFA)

Method C: 2 mL/min, 25% ACN (0.1% TFA)

Method D: 2 mL/min, 26% ACN (0.1% TFA)

Method E: 4.5 mL/min, 24% ACN (0.1% TFA)

Method F: 2 mL/min, 24% ACN (0.1% TFA)

Method G: 2 mL/min, 27% ACN (0.1% TFA)

Method H: 4.5 mL/min, 25% ACN (0.1% TFA)

Method I: 4.5 mL/min, 16% ACN (0.1% AcOH)

Method J: 2 mL/min, 18% ACN (0.1% AcOH)

BL06 was radiolabeled with [ $^{68}\text{Ga}$ ]GaCl<sub>3</sub> as outlined in the Methods section. The mixture was purified by semi-prep HPLC (Method A) with a retention time of 16.6 mins, and quality control was performed by analytical HPLC (Method B) with the co-injection of the unlabeled standard with a one-twelfth of the radiotracer, with a retention time of 12.2 mins.

BL17 was radiolabeled with [ $^{68}\text{Ga}$ ]GaCl<sub>3</sub> as outlined in the Methods section. The mixture was purified by semi-prep HPLC (Method A) with a retention time of 24.8 mins, and quality control was performed by analytical HPLC (Method C) with the co-injection of the unlabeled standard with a one-twelfth of the radiotracer, with a retention time of 6.8 mins.

BL20 was radiolabeled with [ $^{68}\text{Ga}$ ] $\text{GaCl}_3$  as outlined in the Methods section. The mixture was purified by semi-prep HPLC (Method A) with a retention time of 21.9 mins, and quality control was performed by analytical HPLC (Method D) with the co-injection of the unlabeled standard with a one-twelfth of the radiotracer, with a retention time of 6.1 mins.

BL25 was radiolabeled with [ $^{68}\text{Ga}$ ] $\text{GaCl}_3$  as outlined in the Methods section. The mixture was purified by semi-prep HPLC (Method E) with a retention time of 16.2 mins, and quality control was performed by analytical HPLC (Method F) with the co-injection of the unlabeled standard with a one-twelfth of the radiotracer, with a retention time of 5.2 mins.

BL30 was radiolabeled with [ $^{68}\text{Ga}$ ] $\text{GaCl}_3$  as outlined in the Methods section. The mixture was purified by semi-prep HPLC (Method A) with a retention time of 25.3 mins, and quality control was performed by analytical HPLC (Method G) with the co-injection of the unlabeled standard with a one-twelfth of the radiotracer, with a retention time of 5.7 mins.

BL31 was radiolabeled with [ $^{68}\text{Ga}$ ] $\text{GaCl}_3$  as outlined in the Methods section. The mixture was purified by semi-prep HPLC (Method H) with a retention time of 25.3 mins, and quality control was performed by analytical HPLC (Method G) with the co-injection of the unlabeled standard with a one-twelfth of the radiotracer, with a retention time of 7.1 mins.

Pentixafor was radiolabeled with [ $^{68}\text{Ga}$ ] $\text{GaCl}_3$  as outlined in the Methods section. The mixture was purified by semi-prep HPLC (Method I), with a retention time of 31.9



mins, and quality control was performed by analytical HPLC 2 mL/min, (Method J) with the co-injection of the unlabeled standard with a one-twelfth of the radiotracer, with a retention time of 7.5 mins.

## Imaging Data

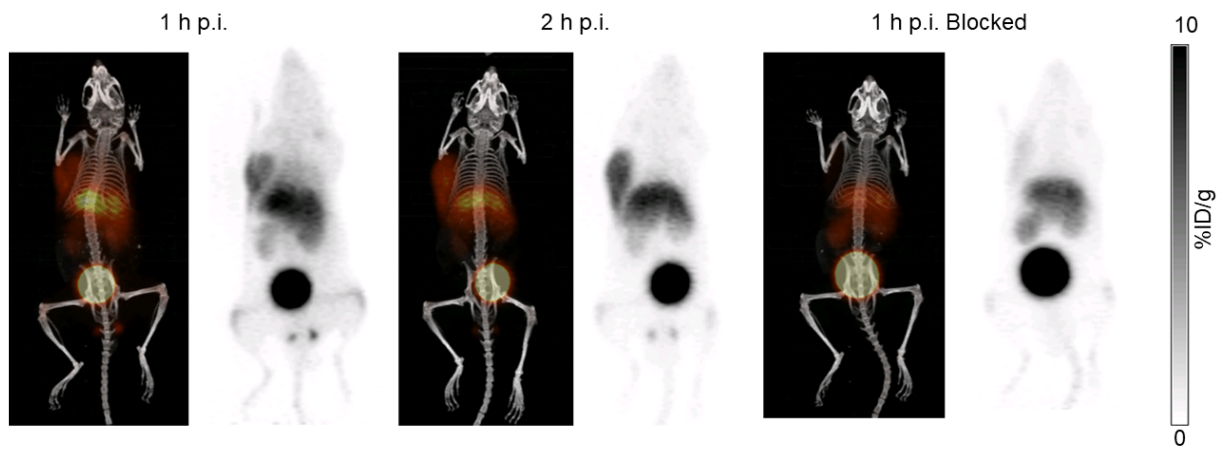

**Supplementary Figure S1.** Maximum intensity projections for PET/CT and PET alone at 1 h p.i., 2 h p.i. and 1 h p.i. blocked of  $[^{68}\text{Ga}]\text{Ga-BL06}$ . Blocking was performed via i.p. injection of 7.5  $\mu\text{g}$  of LY2510924 15 mins prior. Scales of the PET images is 0-10 %ID/g.

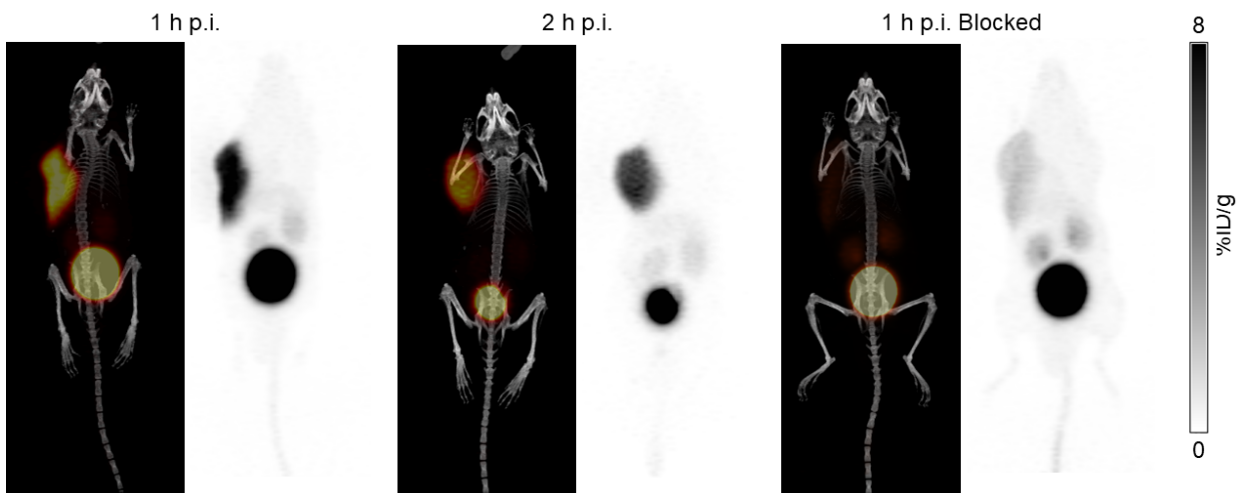

**Supplementary Figure S2.** Maximum intensity projections for PET/CT and PET alone at 1 h p.i., 2 h p.i. and 1 h p.i. blocked of  $[^{68}\text{Ga}]\text{Ga-BL31}$ . Blocking was performed via i.p. injection of 7.5  $\mu\text{g}$  of LY2510924 15 mins prior. Scales of the PET images are 0-8 %ID/g.

## Biodistribution Data

**Supplementary Table S1.** Biodistribution data (%ID/g) of [<sup>68</sup>Ga]Ga-Pentixafor in Daudi tumor-bearing mice at selected time points. Mice in the 1 h blocked group received an injection of 7.5 µg of LY2510924 (i.p.) 15 min before tracer administration.

| Radiotracer             | Molar Activity<br>(GBq/µmol) | Radiochemical Purity (%) | Radiochemical Yield (%) |
|-------------------------|------------------------------|--------------------------|-------------------------|
| [ <sup>68</sup> Ga]BL02 | 258±90 <sup>**</sup>         | >99% <sup>**</sup>       | 64.0±9.9% <sup>**</sup> |
| [ <sup>68</sup> Ga]BL06 | 54±36 <sup>x</sup>           | >99% <sup>x</sup>        | 63.8±2.6 <sup>x</sup>   |
| [ <sup>68</sup> Ga]BL17 | N.D                          | >97% <sup>x</sup>        | 64.6±1.6 <sup>x</sup>   |
| [ <sup>68</sup> Ga]BL20 | 98.79 <sup>*</sup>           | >99%                     | 70.5 <sup>*</sup>       |
| [ <sup>68</sup> Ga]BL25 | N.D                          | >99% <sup>*</sup>        | 61.7 <sup>*</sup>       |
| [ <sup>68</sup> Ga]BL30 | 81.77 <sup>*</sup>           | >99% <sup>*</sup>        | 75.0 <sup>*</sup>       |
| [ <sup>68</sup> Ga]BL31 | 429±180 <sup>†</sup>         | >99% <sup>†</sup>        | 63.8±2.6 <sup>†</sup>   |

\* n = 1, <sup>x</sup> n = 2, <sup>†</sup> n = 4, <sup>\*\*</sup> n = 9, N.D: not determined.

**Supplementary Table S2.** Biodistribution data (%ID/g) of [<sup>68</sup>Ga]Ga-BL06 in Daudi tumor-bearing mice at selected time points. Mice in the 1 h blocked group received an injection of 7.5 µg of LY2510924 (i.p.) 15 min before tracer administration.

| <b>[<sup>68</sup>Ga]Ga-BL06</b> | <b>1 h</b>  |              |          | <b>1 h blocked</b> |              |          | <b>2 h</b>  |              |          |
|---------------------------------|-------------|--------------|----------|--------------------|--------------|----------|-------------|--------------|----------|
|                                 | <b>Mean</b> | <b>S.Dev</b> | <b>n</b> | <b>Mean</b>        | <b>S.Dev</b> | <b>n</b> | <b>Mean</b> | <b>S.Dev</b> | <b>n</b> |
| <b>Blood</b>                    | 2.78        | 0.46         | 6        | 1.17               | 0.26         | 7        | 1.11        | 0.24         | 8        |
| <b>Fat</b>                      | 0.35        | 0.10         | 6        | 0.16               | 0.09         | 7        | 0.19        | 0.04         | 8        |
| <b>Testes</b>                   | 0.61        | 0.10         | 6        | 0.34               | 0.06         | 7        | 0.46        | 0.02         | 8        |
| <b>Intestine</b>                | 1.07        | 0.13         | 6        | 0.70               | 0.18         | 7        | 0.68        | 0.11         | 8        |
| <b>Stomach</b>                  | 0.29        | 0.08         | 6        | 0.14               | 0.04         | 7        | 0.21        | 0.07         | 8        |
| <b>Spleen</b>                   | 15.53       | 1.83         | 6        | 3.30               | 0.73         | 7        | 9.14        | 1.60         | 8        |
| <b>Liver</b>                    | 8.60        | 0.77         | 6        | 9.25               | 0.94         | 6        | 10.35       | 0.40         | 8        |
| <b>Pancreas</b>                 | 0.70        | 0.09         | 6        | 0.29               | 0.08         | 7        | 0.39        | 0.07         | 7        |
| <b>Adrenals</b>                 | 3.61        | 1.14         | 5        | 0.80               | 0.33         | 7        | 3.19        | 1.11         | 8        |
| <b>Kidney</b>                   | 6.25        | 1.05         | 6        | 8.26               | 2.79         | 7        | 4.82        | 0.61         | 8        |
| <b>Lung</b>                     | 15.00       | 2.06         | 6        | 2.20               | 0.55         | 7        | 7.18        | 0.86         | 8        |
| <b>Heart</b>                    | 1.73        | 0.25         | 6        | 0.48               | 0.11         | 7        | 0.93        | 0.17         | 8        |
| <b>Muscle</b>                   | 0.41        | 0.11         | 6        | 0.19               | 0.04         | 7        | 0.21        | 0.06         | 8        |
| <b>Bone</b>                     | 1.84        | 0.65         | 6        | 0.82               | 0.26         | 7        | 1.11        | 0.25         | 8        |
| <b>Brain</b>                    | 0.06        | 0.00         | 6        | 0.03               | 0.01         | 7        | 0.03        | 0.00         | 8        |
| <b>Tumor</b>                    | 10.26       | 1.29         | 6        | 2.06               | 0.62         | 7        | 11.32       | 1.44         | 8        |
| <b>Ratios</b>                   |             |              |          |                    |              |          |             |              |          |
| <b>Tumor:Blood</b>              | 3.75        | 1.18         | 6        | 1.84               | 0.74         | 7        | 10.35       | 1.33         | 8        |
| <b>Tumor:Liver</b>              | 1.19        | 0.56         | 6        | 0.21               | 0.05         | 6        | 1.10        | 0.14         | 8        |
| <b>Tumor:Spleen</b>             | 0.67        | 0.17         | 6        | 0.64               | 0.19         | 7        | 1.25        | 0.13         | 8        |
| <b>Tumor:Muscle</b>             | 25.59       | 4.15         | 6        | 10.97              | 2.86         | 7        | 57.98       | 13.51        | 8        |
| <b>Tumor:Bone</b>               | 6.04        | 1.30         | 6        | 2.77               | 1.10         | 7        | 10.56       | 2.36         | 8        |
| <b>Tumor:Lungs</b>              | 0.69        | 0.21         | 6        | 0.95               | 0.26         | 7        | 1.59        | 0.21         | 8        |

**Supplementary Table S3.** Biodistribution data (%ID/g) of [<sup>68</sup>Ga]Ga-BL20 in Daudi tumor-bearing mice at selected time points. Mice in the 1 h blocked group received an injection of 7.5 µg of LY2510924 (i.p.) 15 min before tracer administration.

| <u>[<sup>68</sup>Ga]Ga-BL20</u> | <u>1 h</u> |       |   | <u>1 h blocked</u> |       |   | <u>2 h</u> |        |   |
|---------------------------------|------------|-------|---|--------------------|-------|---|------------|--------|---|
|                                 | Mean       | S.Dev | n | Mean               | S.Dev | n | Mean       | S.Dev  | n |
| <b>Blood</b>                    | 0.42       | 0.12  | 3 | 0.65               | na    | 1 | 0.08       | 0.02   | 4 |
| <b>Fat</b>                      | 0.06       | 0.03  | 3 | 0.12               | na    | 1 | 0.01       | 0.01   | 4 |
| <b>Testes</b>                   | 0.15       | 0.03  | 3 | 0.20               | na    | 1 | 0.05       | 0.01   | 4 |
| <b>Intestine</b>                | 0.21       | 0.02  | 3 | 0.37               | na    | 1 | 0.25       | 0.25   | 4 |
| <b>Stomach</b>                  | 0.05       | 0.01  | 3 | 0.24               | na    | 1 | 0.05       | 0.03   | 4 |
| <b>Spleen</b>                   | 0.49       | 0.07  | 3 | 0.30               | na    | 1 | 0.21       | 0.06   | 4 |
| <b>Liver</b>                    | 0.58       | 0.07  | 3 | 0.44               | na    | 1 | 0.51       | 0.04   | 4 |
| <b>Pancreas</b>                 | 0.11       | 0.03  | 3 | 0.16               | na    | 1 | 0.04       | 0.01   | 4 |
| <b>Adrenals</b>                 | 0.35       | 0.20  | 3 | 0.35               | na    | 1 | 0.27       | 0.17   | 4 |
| <b>Kidney</b>                   | 3.58       | 0.26  | 3 | 5.92               | na    | 1 | 3.02       | 0.22   | 4 |
| <b>Lung</b>                     | 0.51       | 0.08  | 3 | 0.71               | na    | 1 | 0.22       | 0.04   | 4 |
| <b>Heart</b>                    | 0.15       | 0.03  | 3 | 0.22               | na    | 1 | 0.05       | 0.01   | 4 |
| <b>Muscle</b>                   | 0.08       | 0.02  | 3 | 0.13               | na    | 1 | 0.02       | 0.00   | 4 |
| <b>Bone</b>                     | 0.17       | 0.00  | 3 | 0.15               | na    | 1 | 0.05       | 0.03   | 4 |
| <b>Brain</b>                    | 0.01       | 0.00  | 3 | 0.02               | na    | 1 | 0.01       | 0.00   | 4 |
| <b>Tumor</b>                    | 9.07       | 0.76  | 3 | 0.59               | na    | 1 | 8.01       | 1.39   | 4 |
| <b>Ratios</b>                   |            |       |   |                    |       |   |            |        |   |
| <b>Tumour:Blood</b>             | 22.78      | 7.35  | 3 | 0.90               | na    | 1 | 113.17     | 45.03  | 4 |
| <b>Tumour:Liver</b>             | 15.68      | 0.90  | 3 | 1.34               | na    | 1 | 15.57      | 1.73   | 4 |
| <b>Tumour:Spleen</b>            | 18.55      | 1.38  | 3 | 1.96               | na    | 1 | 41.58      | 13.90  | 4 |
| <b>Tumour:Muscle</b>            | 125.40     | 54.59 | 3 | 4.49               | na    | 1 | 346.93     | 81.84  | 4 |
| <b>Tumour:Bone</b>              | 54.57      | 6.00  | 3 | 3.88               | na    | 1 | 189.39     | 109.18 | 4 |
| <b>Tumour:Lung</b>              | 18.12      | 3.56  | 3 | 0.82               | na    | 1 | 37.40      | 8.71   | 4 |

**Supplementary Table S4.** Biodistribution data (%ID/g) of [<sup>68</sup>Ga]Ga-BL17 in Daudi tumor-bearing mice at selected time points. Mice in the 1 h blocked group received an injection of 7.5 µg of LY2510924 (i.p.) 15 min before tracer administration.

| <u>[<sup>68</sup>Ga]Ga-BL17</u> | <b>1 h</b>  |              |          | <b>1 h blocked</b> |              |          | <b>2 h</b>  |              |          |
|---------------------------------|-------------|--------------|----------|--------------------|--------------|----------|-------------|--------------|----------|
|                                 | <b>Mean</b> | <b>S.Dev</b> | <b>n</b> | <b>Mean</b>        | <b>S.Dev</b> | <b>n</b> | <b>Mean</b> | <b>S.Dev</b> | <b>n</b> |
| <b>Blood</b>                    | 0.41        | 0.12         | 4        | 1.40               | 0.14         | 2        | 0.09        | 0.01         | 4        |
| <b>Fat</b>                      | 0.04        | 0.01         | 4        | 0.32               | 0.01         | 2        | 0.02        | 0.01         | 4        |
| <b>Testes</b>                   | 0.20        | 0.05         | 4        | 0.53               | 0.16         | 2        | 0.06        | 0.01         | 4        |
| <b>Intestine</b>                | 0.21        | 0.07         | 4        | 0.65               | 0.08         | 2        | 0.15        | 0.07         | 4        |
| <b>Stomach</b>                  | 0.05        | 0.03         | 4        | 0.18               | 0.02         | 2        | 0.03        | 0.02         | 4        |
| <b>Spleen</b>                   | 0.33        | 0.07         | 4        | 0.81               | 0.20         | 2        | 0.30        | 0.05         | 4        |
| <b>Liver</b>                    | 0.50        | 0.07         | 4        | 0.84               | 0.13         | 2        | 0.47        | 0.08         | 4        |
| <b>Pancreas</b>                 | 0.10        | 0.03         | 4        | 0.38               | 0.05         | 2        | 0.04        | 0.02         | 4        |
| <b>Adrenals</b>                 | 0.16        | 0.07         | 4        | 0.79               | 0.25         | 2        | 0.20        | 0.12         | 4        |
| <b>Kidney</b>                   | 3.30        | 0.41         | 4        | 15.17              | 8.21         | 2        | 3.28        | 0.34         | 4        |
| <b>Lung</b>                     | 0.51        | 0.12         | 4        | 1.35               | 0.20         | 2        | 0.25        | 0.03         | 4        |
| <b>Heart</b>                    | 0.14        | 0.04         | 4        | 0.45               | 0.05         | 2        | 0.06        | 0.01         | 4        |
| <b>Muscle</b>                   | 0.10        | 0.03         | 4        | 0.25               | 0.00         | 2        | 0.03        | 0.01         | 4        |
| <b>Bone</b>                     | 0.09        | 0.03         | 4        | 0.31               | 0.05         | 2        | 0.09        | 0.03         | 4        |
| <b>Brain</b>                    | 0.02        | 0.01         | 4        | 0.03               | 0.00         | 2        | 0.01        | 0.00         | 4        |
| <b>Tumor</b>                    | <b>6.32</b> | <b>0.67</b>  | 4        | 0.68               | 0.00         | 2        | 6.40        | 1.60         | 4        |
| <b>Ratios</b>                   |             |              |          |                    |              |          |             |              |          |
| <b>Tumour:Blood</b>             | 16.94       | 6.57         | 4        | 0.49               | 0.05         | 2        | 69.33       | 18.61        | 4        |
| <b>Tumour:Liver</b>             | 12.66       | 0.79         | 4        | 0.81               | 0.13         | 2        | 13.69       | 4.46         | 4        |
| <b>Tumour:Spleen</b>            | 19.76       | 3.57         | 4        | 0.87               | 0.22         | 2        | 21.11       | 6.42         | 4        |
| <b>Tumour:Muscle</b>            | 67.93       | 16.71        | 4        | 2.74               | 0.05         | 2        | 256.87      | 72.49        | 4        |
| <b>Tumour:Bone</b>              | 76.60       | 21.25        | 4        | 2.24               | 0.35         | 2        | 79.15       | 32.79        | 4        |
| <b>Tumour:Lung</b>              | 12.64       | 2.48         | 4        | 0.51               | 0.07         | 2        | 25.37       | 6.19         | 4        |

**Supplementary Table S5.** Biodistribution data (%ID/g) of [<sup>68</sup>Ga]Ga-BL25 in Daudi tumor-bearing mice at selected time points.

| <b>[<sup>68</sup>Ga]Ga-BL25</b> | <b>2 h</b>  |              |          |
|---------------------------------|-------------|--------------|----------|
|                                 | <b>Mean</b> | <b>S.Dev</b> | <b>n</b> |
| <b>Blood</b>                    | 0.18        | 0.01         | 4        |
| <b>Fat</b>                      | 0.02        | 0.01         | 4        |
| <b>Testes</b>                   | 0.07        | 0.00         | 4        |
| <b>Intestine</b>                | 0.13        | 0.03         | 4        |
| <b>Stomach</b>                  | 0.03        | 0.02         | 4        |
| <b>Spleen</b>                   | 0.19        | 0.03         | 4        |
| <b>Liver</b>                    | 0.47        | 0.04         | 4        |
| <b>Pancreas</b>                 | 0.05        | 0.01         | 4        |
| <b>Adrenals</b>                 | 0.10        | 0.01         | 4        |
| <b>Kidney</b>                   | 1.92        | 0.07         | 4        |
| <b>Lung</b>                     | 0.37        | 0.11         | 4        |
| <b>Heart</b>                    | 0.07        | 0.00         | 4        |
| <b>Muscle</b>                   | 0.04        | 0.00         | 4        |
| <b>Bone</b>                     | 0.06        | 0.02         | 4        |
| <b>Brain</b>                    | 0.01        | 0.00         | 4        |
| <b>Tumor</b>                    | 5.53        | 0.29         | 4        |
| <b>Ratios</b>                   |             |              |          |
| <b>Tumor:Blood</b>              | 30.77       | 1.18         | 4        |
| <b>Tumor:Liver</b>              | 12.05       | 0.76         | 4        |
| <b>Tumor:Spleen</b>             | 30.72       | 3.73         | 4        |
| <b>Tumor:Muscle</b>             | 159.64      | 19.97        | 4        |
| <b>Tumor:Bone</b>               | 103.83      | 33.98        | 4        |
| <b>Tumor:Lung</b>               | 16.13       | 4.21         | 4        |

**Supplementary Table S6.** Biodistribution data (%ID/g) of [<sup>68</sup>Ga]Ga-BL31 in Daudi tumor-bearing mice at selected time points. Mice in the 1 h blocked group received an injection of 7.5 µg of LY2510924 (i.p.) 15 min before tracer administration.

| <u>[<sup>68</sup>Ga]Ga-BL31</u> | 1 h   |       |   | 1 h blocked |      |   | 2 h   |       |   |
|---------------------------------|-------|-------|---|-------------|------|---|-------|-------|---|
|                                 | Mean  | SD    | n | Mean        | SD   | n | Mean  | SD    | n |
| <b>Blood</b>                    | 0.35  | 0.07  | 7 | 0.58        | 0.21 | 7 | 0.08  | 0.04  | 7 |
| <b>Fat</b>                      | 0.05  | 0.02  | 7 | 0.10        | 0.04 | 7 | 0.02  | 0.01  | 7 |
| <b>Testes</b>                   | 0.17  | 0.06  | 7 | 0.21        | 0.07 | 7 | 0.06  | 0.01  | 7 |
| <b>Intestine</b>                | 0.23  | 0.03  | 7 | 0.47        | 0.36 | 7 | 0.11  | 0.04  | 7 |
| <b>Stomach</b>                  | 0.06  | 0.03  | 6 | 0.11        | 0.06 | 7 | 0.04  | 0.01  | 6 |
| <b>Spleen</b>                   | 0.33  | 0.03  | 7 | 0.34        | 0.11 | 7 | 0.24  | 0.05  | 7 |
| <b>Liver</b>                    | 0.67  | 0.10  | 7 | 0.71        | 0.13 | 7 | 0.66  | 0.10  | 7 |
| <b>Pancreas</b>                 | 0.09  | 0.02  | 7 | 0.13        | 0.05 | 7 | 0.04  | 0.01  | 7 |
| <b>Adrenals</b>                 | 0.18  | 0.02  | 6 | 0.21        | 0.07 | 6 | 0.17  | 0.09  | 5 |
| <b>Kidney</b>                   | 2.54  | 0.26  | 7 | 3.83        | 1.08 | 7 | 2.23  | 0.21  | 7 |
| <b>Lung</b>                     | 0.56  | 0.09  | 7 | 0.67        | 0.21 | 7 | 0.26  | 0.05  | 7 |
| <b>Heart</b>                    | 0.14  | 0.03  | 7 | 0.19        | 0.07 | 7 | 0.05  | 0.01  | 7 |
| <b>Muscle</b>                   | 0.08  | 0.02  | 7 | 0.12        | 0.06 | 7 | 0.03  | 0.01  | 7 |
| <b>Bone</b>                     | 0.12  | 0.03  | 7 | 0.22        | 0.16 | 7 | 0.07  | 0.04  | 7 |
| <b>Brain</b>                    | 0.02  | 0.01  | 7 | 0.02        | 0.00 | 7 | 0.01  | 0.01  | 7 |
| <b>Tumor</b>                    | 9.41  | 1.00  | 7 | 0.94        | 0.54 | 6 | 8.97  | 1.45  | 7 |
| <b>Ratios</b>                   |       |       |   |             |      |   |       |       |   |
| <b>Tumor:Blood</b>              | 26.91 | 4.33  | 7 | 1.68        | 1.06 | 6 | 121.5 | 44.97 | 7 |
| <b>Tumor:Liver</b>              | 14.23 | 1.84  | 7 | 1.34        | 0.67 | 6 | 13.73 | 2.01  | 7 |
| <b>Tumor:Spleen</b>             | 28.40 | 2.93  | 7 | 3.12        | 2.13 | 6 | 39.28 | 9.47  | 7 |
| <b>Tumor:Muscle</b>             | 128.8 | 29.07 | 7 | 9.40        | 7.01 | 6 | 302.4 | 92.32 | 7 |
| <b>Tumor:Bone</b>               | 86.12 | 25.06 | 7 | 6.07        | 5.50 | 6 | 170.5 | 132.3 | 7 |
| <b>Tumor:Lung</b>               | 17.15 | 2.85  | 7 | 1.44        | 1.02 | 6 | 35.39 | 6.92  | 7 |
| <b>Tumor:Kidney</b>             | 3.73  | 0.52  | 7 | 0.26        | 0.16 | 6 | 3.95  | 0.54  | 7 |



**Supplementary Table S7.** Biodistribution data (%ID/g) of [<sup>68</sup>Ga]Ga-BL30 in Daudi tumor-bearing mice at selected time points.

| <b>[<sup>68</sup>Ga]Ga-BL30</b> | <b>1 h</b>  |           |          |
|---------------------------------|-------------|-----------|----------|
|                                 | <b>Mean</b> | <b>SD</b> | <b>n</b> |
| <b>Blood</b>                    | 0.27        | 0.08      | 4        |
| <b>Fat</b>                      | 0.03        | 0.01      | 4        |
| <b>Testes</b>                   | 0.10        | 0.01      | 4        |
| <b>Intestine</b>                | 0.20        | 0.03      | 4        |
| <b>Stomach</b>                  | 0.06        | 0.01      | 3        |
| <b>Spleen</b>                   | 0.25        | 0.04      | 4        |
| <b>Liver</b>                    | 0.42        | 0.27      | 4        |
| <b>Pancreas</b>                 | 0.07        | 0.01      | 4        |
| <b>Adrenals</b>                 | 0.13        | 0.08      | 4        |
| <b>Kidney</b>                   | 8.99        | 1.56      | 4        |
| <b>Lung</b>                     | 0.43        | 0.11      | 4        |
| <b>Heart</b>                    | 0.11        | 0.03      | 4        |
| <b>Muscle</b>                   | 0.05        | 0.01      | 4        |
| <b>Bone</b>                     | 0.07        | 0.02      | 4        |
| <b>Brain</b>                    | 0.01        | 0.00      | 4        |
| <b>Tumor</b>                    | 5.76        | 0.77      | 4        |
| <b>Ratios</b>                   |             |           |          |
| <b>Tumor:Blood</b>              | 23.80       | 6.10      | 4        |
| <b>Tumor:Liver</b>              | 16.43       | 9.13      | 4        |
| <b>Tumor:Spleen</b>             | 24.47       | 1.74      | 4        |
| <b>Tumor:Muscle</b>             | 122.74      | 20.39     | 4        |
| <b>Tumor:Bone</b>               | 91.99       | 14.51     | 4        |
| <b>Tumor:Lung</b>               | 14.17       | 2.89      | 4        |
| <b>Tumor:Kidney</b>             | 0.68        | 0.03      | 4        |

**Supplementary Table S8.** Biodistribution data (%ID/g) of [<sup>68</sup>Ga]Ga-Pentixafor in Daudi tumor-bearing mice at selected time points. Mice in the 1 h blocked group received an injection of 7.5 µg of LY2510924 (i.p.) 15 min before tracer administration.

| <b>[<sup>68</sup>Ga]Ga-Pentixafor</b> | <b>1 h</b>  |              |          | <b>1 h blocked</b> |              |          | <b>2 h</b>  |              |          |
|---------------------------------------|-------------|--------------|----------|--------------------|--------------|----------|-------------|--------------|----------|
|                                       | <b>Mean</b> | <b>S.Dev</b> | <b>n</b> | <b>Mean</b>        | <b>S.Dev</b> | <b>n</b> | <b>Mean</b> | <b>S.Dev</b> | <b>n</b> |
| <b>Blood</b>                          | 0.97        | 0.12         | 7        | 1.23               | 0.35         | 7        | 0.28        | 0.04         | 7        |
| <b>Fat</b>                            | 0.08        | 0.02         | 7        | 0.18               | 0.07         | 7        | 0.04        | 0.01         | 7        |
| <b>Testes</b>                         | 0.39        | 0.06         | 7        | 0.55               | 0.14         | 7        | 0.13        | 0.03         | 7        |
| <b>Intestine</b>                      | 0.43        | 0.07         | 7        | 0.59               | 0.25         | 7        | 0.20        | 0.05         | 7        |
| <b>Stomach</b>                        | 0.13        | 0.04         | 7        | 0.17               | 0.08         | 7        | 0.05        | 0.02         | 7        |
| <b>Spleen</b>                         | 0.63        | 0.09         | 7        | 0.59               | 0.19         | 7        | 0.33        | 0.08         | 7        |
| <b>Liver</b>                          | 1.23        | 0.15         | 7        | 1.25               | 0.25         | 7        | 0.89        | 0.12         | 7        |
| <b>Pancreas</b>                       | 0.21        | 0.03         | 7        | 0.25               | 0.08         | 6        | 0.08        | 0.02         | 7        |
| <b>Adrenals</b>                       | 0.34        | 0.12         | 7        | 0.38               | 0.14         | 7        | 0.18        | 0.09         | 7        |
| <b>Kidney</b>                         | 2.78        | 0.39         | 6        | 3.16               | 0.73         | 6        | 1.76        | 0.38         | 7        |
| <b>Lung</b>                           | 1.16        | 0.14         | 7        | 1.39               | 0.40         | 7        | 0.54        | 0.08         | 7        |
| <b>Heart</b>                          | 0.36        | 0.04         | 7        | 0.47               | 0.14         | 7        | 0.13        | 0.03         | 7        |
| <b>Muscle</b>                         | 0.20        | 0.04         | 7        | 0.26               | 0.08         | 7        | 0.06        | 0.02         | 7        |
| <b>Bone</b>                           | 0.18        | 0.04         | 7        | 0.27               | 0.14         | 7        | 0.14        | 0.05         | 7        |
| <b>Brain</b>                          | 0.03        | 0.01         | 7        | 0.03               | 0.01         | 7        | 0.01        | 0.00         | 7        |
| <b>Tumor</b>                          | 6.31        | 1.02         | 7        | 0.61               | 0.14         | 7        | 5.23        | 0.43         | 7        |
| <b>Ratios</b>                         |             |              |          |                    |              |          |             |              |          |
| <b>Tumor-to-Blood</b>                 | 6.53        | 0.97         | 7        | 0.53               | 0.16         | 7        | 18.94       | 2.67         | 7        |
| <b>Tumor-to-Muscle</b>                | 33.25       | 9.31         | 7        | 2.55               | 1.10         | 7        | 95.44       | 36.68        | 7        |
| <b>Tumor-to-Liver</b>                 | 5.14        | 0.82         | 7        | 0.50               | 0.11         | 7        | 5.93        | 0.72         | 7        |
| <b>Tumor-to-Lung</b>                  | 5.48        | 0.89         | 7        | 0.47               | 0.15         | 7        | 9.95        | 1.99         | 7        |
| <b>Tumor-to-Spleen</b>                | 10.20       | 1.86         | 7        | 1.14               | 0.43         | 7        | 16.57       | 4.27         | 7        |
| <b>Tumor-to-Bone</b>                  | 35.99       | 10.19        | 7        | 2.67               | 1.06         | 7        | 43.48       | 19.21        | 7        |
